# Supplementary material for: 57Fe Mössbauer and DFT study of the electronic and spatial structures of the iron(ii) (pseudo)clathrochelates: the effect of ligand field strength
Source: Royal Society of Chemistry journal article supplement (doi:10.1039/d3cp01887c), 2023-01-01
Supplement: d3cp01887c1.pdf [file d3cp01887c1.pdf]

## Supporting Information

for

### **<sup>57</sup>Fe Mössbauer and DFT study of the electronic and spatial structure of the iron(II) (pseudo)clathrochelates: the effect of a ligand field strength**

Denis V. Balatskiy,<sup>a</sup> Alexander S. Chuprin,<sup>b,c</sup> Semyon V. Dudkin,<sup>b,c</sup> Luis Felipe

Desdín-García,<sup>d</sup> Angel Luis Corcho-Valdés,<sup>d</sup> Manuel Antuch,<sup>d</sup>

Vyacheslav M. Buznik,<sup>c</sup> Svetlana Yu. Bratskaya,<sup>a</sup> Yan Z. Voloshin<sup>b,c</sup>

<sup>a</sup> Institute of Chemistry, Far Eastern Branch of the Russian Academy of Sciences, 159 100-letiya Vladivostoka pr., 690022 Vladivostok, Russia

<sup>b</sup> Nesmeyanov Institute of Organoelement Compounds of the Russian Academy of Sciences, 28-1 Vavilova st., 119334 Moscow, Russia

<sup>c</sup> Kurnakov Institute of General and Inorganic Chemistry of the Russian Academy of Sciences, 31 Leninsky pr., 119991 Moscow, Russia

<sup>d</sup> Centro de Aplicaciones Tecnológicas y Desarrollo Nuclear, No. 502, Calle 30 y 5ta Ave. Miramar, CP 11300 La Habana, Cuba

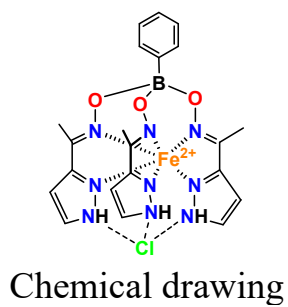

Experimental  $^{57}\text{Fe}$  Mössbauer data:

$\delta$  (Isomer shift, IS, relative to  $\alpha\text{-Fe}$ ) = 0.99 mm/s

$\Delta E_q$  (Quadrupole splitting, QS) = 3.55 mm/s

$\text{Fe}^{2+}@L1$

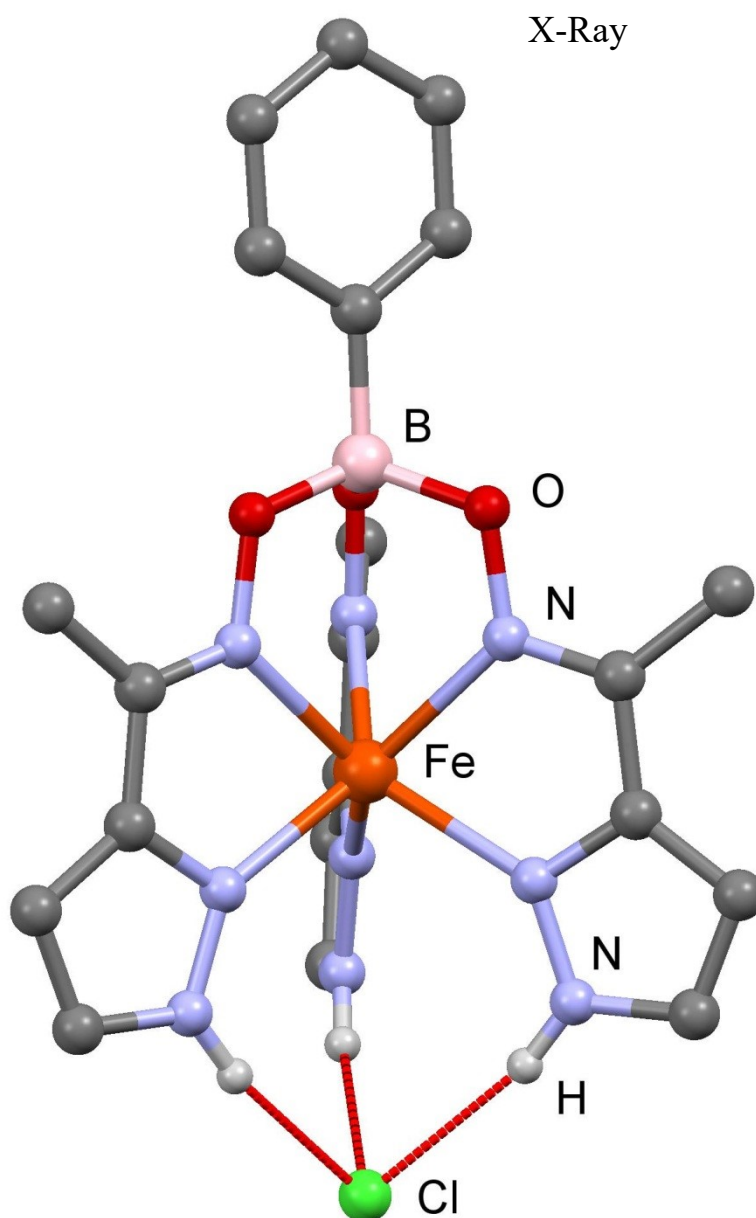

Figure S1. General view of the molecule  $\text{Fe}(\text{PzOx})_3(\text{BC}_6\text{H}_5)\text{Cl}$   
High-spin iron(II) complex

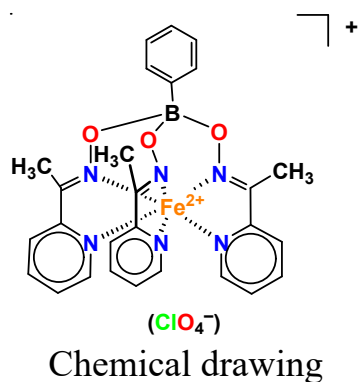

Experimental  $^{57}\text{Fe}$  Mössbauer data:

$\delta$  (Isomer shift, IS, relative to  $\alpha\text{-Fe}$ ) = 0.19 mm/s

$\Delta E_q$  (Quadrupole splitting, QS) = 0.0 mm/s

$\text{Fe}^{2+}@L2$

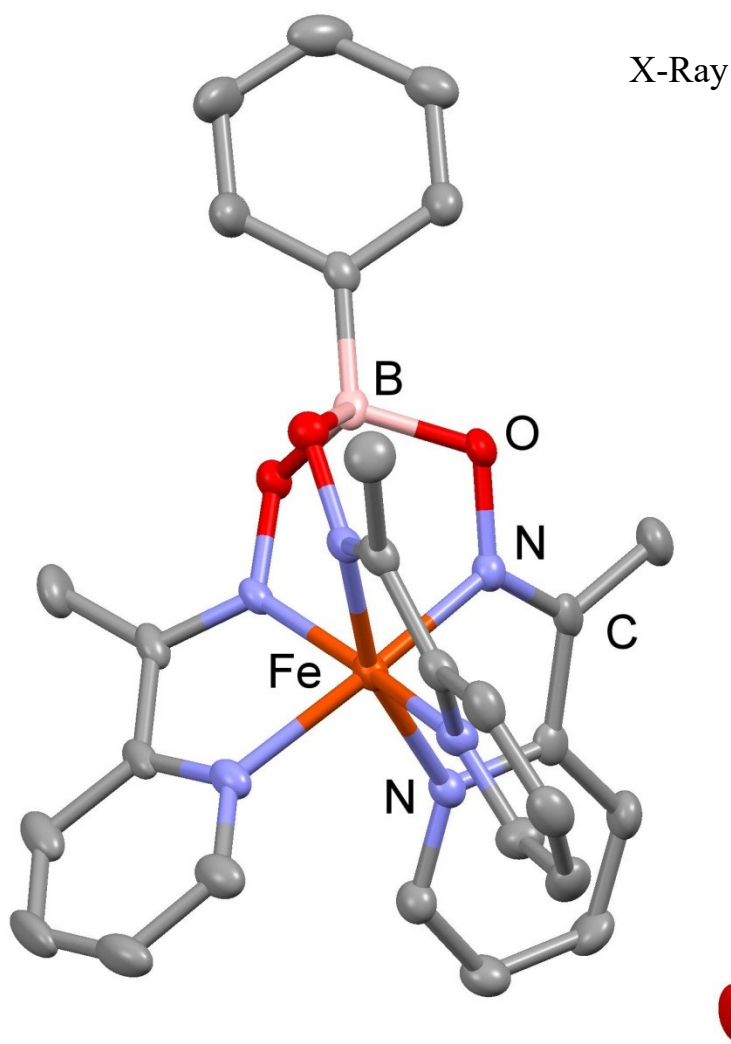

Figure S2. General view of the molecule  $[\text{Fe}(\text{AcPyOx})_3(\text{BC}_6\text{H}_5)](\text{ClO}_4)$

Low-spin iron(II) complex

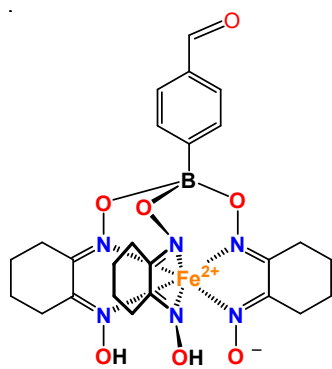

Chemical drawing

Experimental  $^{57}\text{Fe}$  Mössbauer data:

$\delta$  (Isomer shift, IS, relative to  $\alpha\text{-Fe}$ ) = 0.13 mm/s

$\Delta E_q$  (Quadrupole splitting, QS) = 0.56 mm/s

$\text{Fe}^{2+}@L3$

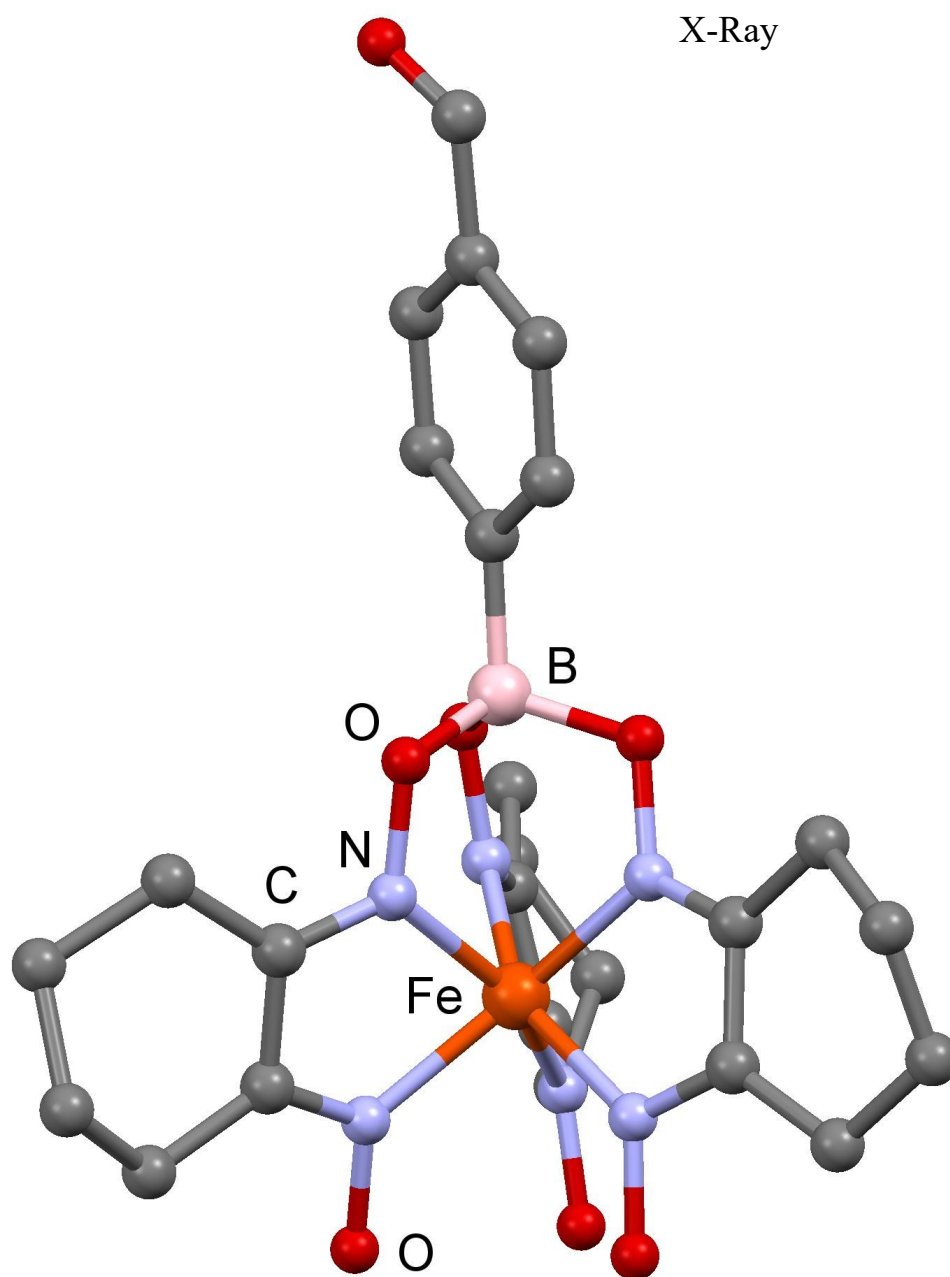

Figure S3. General view of the molecule  $\text{FeN}_4(\text{HN}_2)_2(\text{B4-C}_6\text{H}_4\text{CHO})$

Low-spin iron(II) complex

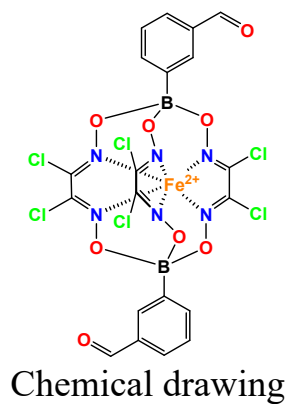

Experimental  $^{57}\text{Fe}$  Mössbauer data:

$\delta$  (Isomer shift, IS, relative to  $\alpha\text{-Fe}$ ) = 0.13 mm/s

$\Delta E_q$  (Quadrupole splitting, QS) = 0.71 mm/s

$\text{Fe}^{2+}@L4$

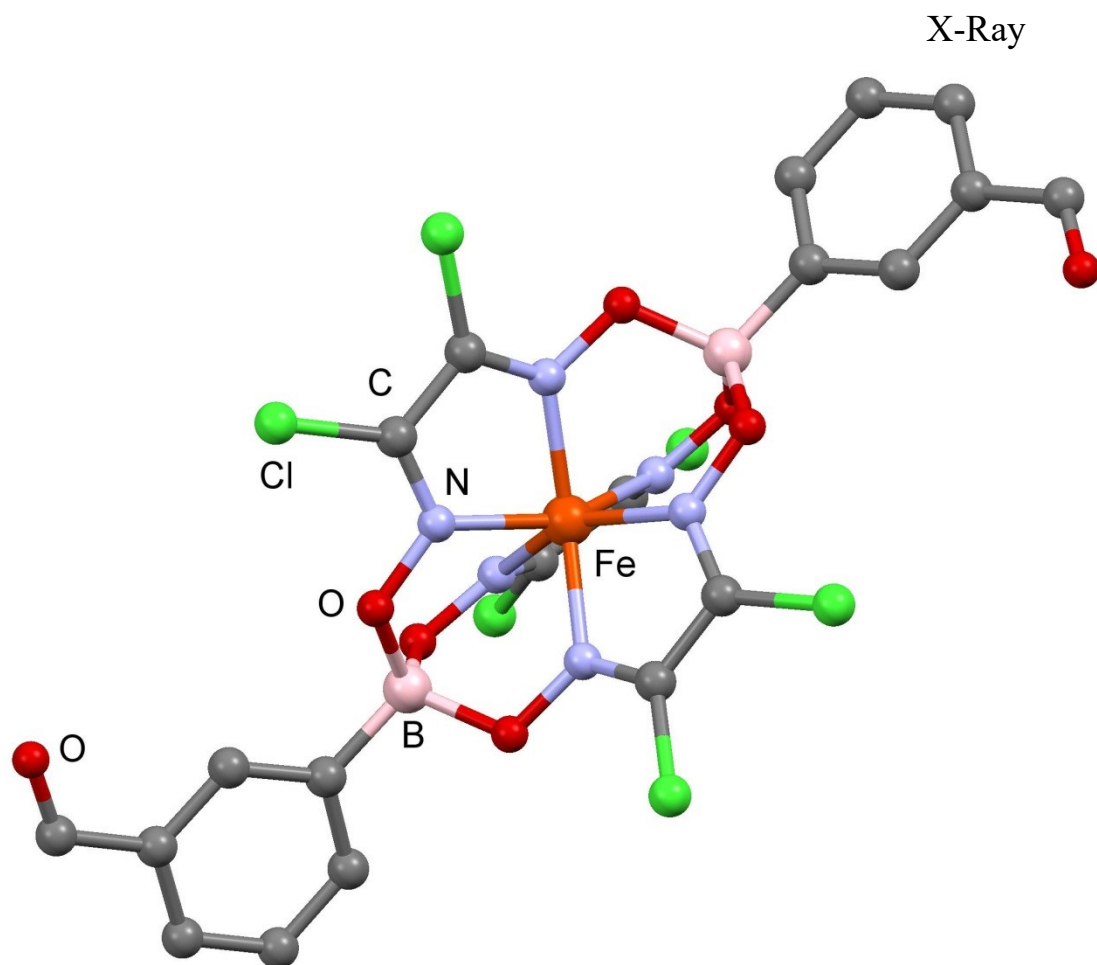

Figure S4. General view of the molecule  $\text{Fe}(\text{Cl}_2\text{Gm})_3(\text{B3-C}_6\text{H}_4\text{CHO})_2$

Low-spin iron(II) complex

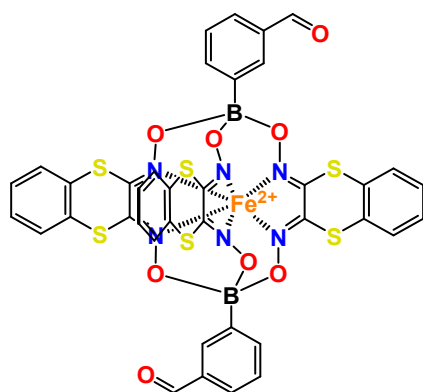

Chemical drawing

Experimental  $^{57}\text{Fe}$  Mössbauer data: $\delta$  (Isomer shift, IS, relative to  $\alpha\text{-Fe}$ ) = 0.09 mm/s $\Delta E_q$  (Quadrupole splitting, QS) = 0.70 mm/s $\text{Fe}^{2+}@L5$ 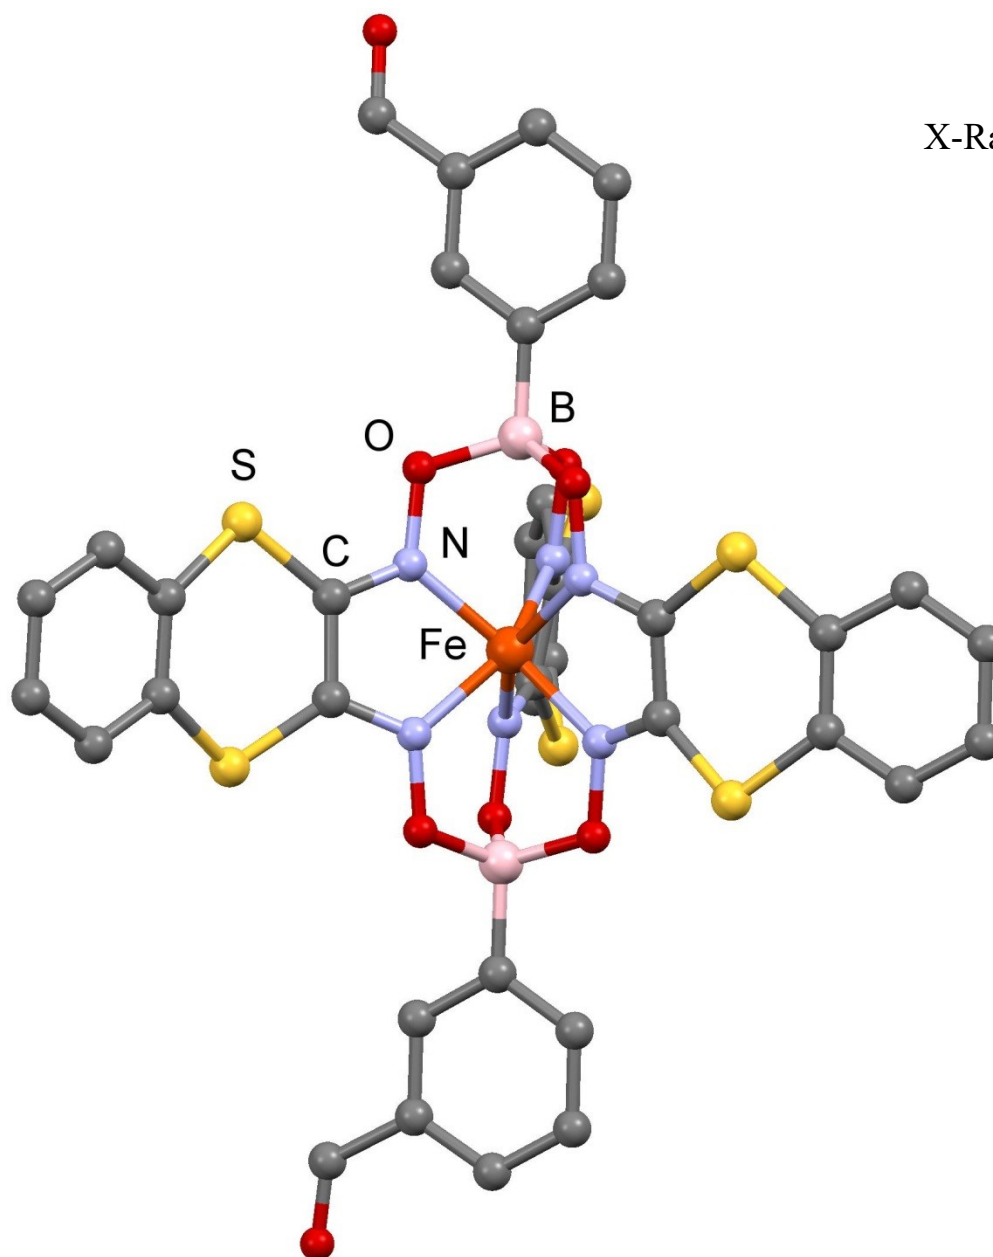

X-Ray

Figure S5. General view of the molecule  $\text{Fe}(\text{S}_2\text{-C}_6\text{H}_4\text{Gm})_3(\text{B}_3\text{-C}_6\text{H}_4\text{CHO})_2$   
Low-spin iron(II) complex

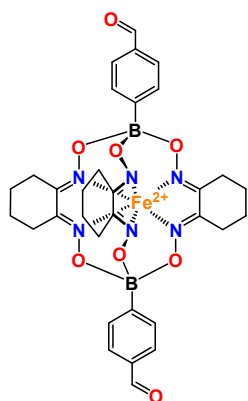

Chemical drawing

Experimental  $^{57}\text{Fe}$  Mössbauer data:

$\delta$  (Isomer shift, IS, relative to  $\alpha\text{-Fe}$ ) = 0.03 mm/s

$\Delta E_q$  (Quadrupole splitting, QS) = 0.65 mm/s

$\text{Fe}^{2+}@L6$

X-Ray

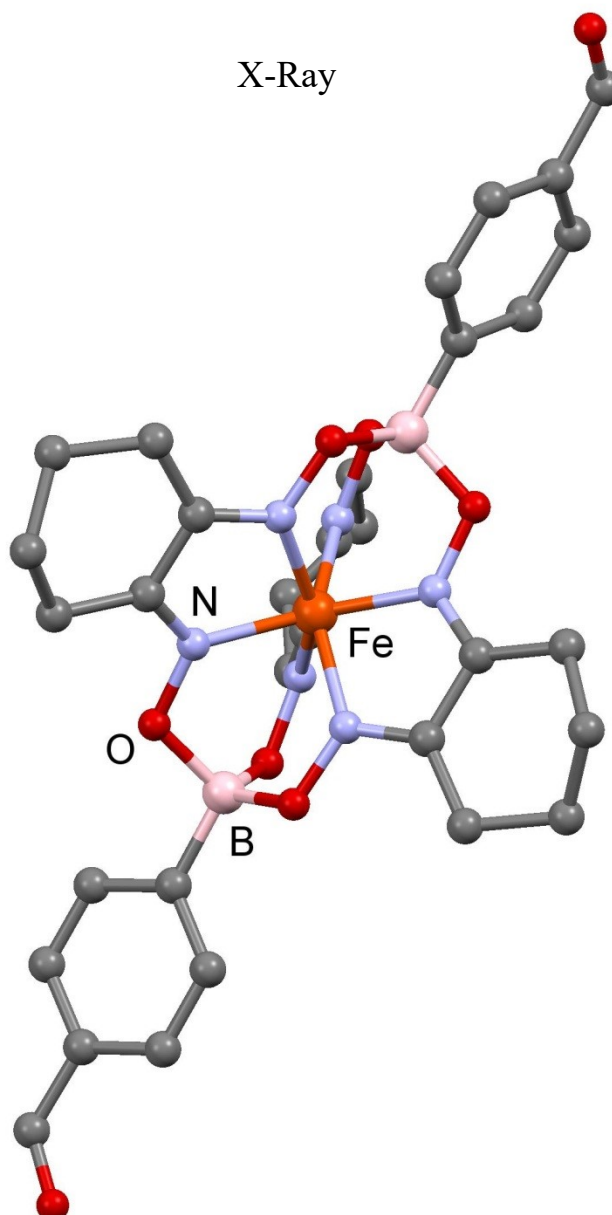

Figure S6. General view of the molecule  $\text{FeN}_3(\text{B4-C}_6\text{H}_4\text{CHO})_2$

Low-spin iron(II) complex

## DFT calculation of QS values

Regarding the quadrupolar splitting, it should be said that the potential caused by a point charge at a certain distance  $r$  from a nucleus is given by  $V(\mathbf{r}) = q/r$ . The electric field is the gradient of the potential, taken with a negative sign, i.e.  $E = -\nabla V$ , and the gradient of the electric field is known as the electric field gradient (EFG), which may be expressed as  $EFG = -\nabla^2 V$ . The EFG may be written in matrix form, according to Eq. S1.

$$EFG = -\nabla^2 V = \begin{bmatrix} V_{xx} & V_{xy} & V_{xz} \\ V_{yx} & V_{yy} & V_{yz} \\ V_{zx} & V_{zy} & V_{zz} \end{bmatrix} \quad (S1),$$

where  $V_{ij} = \partial^2 V / \partial r_i \partial r_j$ , where  $i$  and  $j$  stand for combinations of the Cartesian coordinates  $x$ ,  $y$  or  $z$ .

The hyperfine quadrupole splitting is originated from the coupling of a nuclear electric quadrupole moment ( $Q$ ) for nuclei with nuclear spin  $I > 1/2$  and a non-zero EFG. In the case of the  $^{57}\text{Fe}$  nucleus, the nuclear transition  $I = 1/2 \leftrightarrow I = 3/2$  occurs at 14.41 eV. The spectral difference between the  $I = 3/2$  Kramers doublet  $M_I = \pm 3/2$  and  $M_I = \pm 1/2$  may be expressed according to Eq. S2.

$$\Delta E_Q = \frac{eQV_{zz}}{2} \sqrt{\left(1 + \frac{\eta^2}{3}\right)} \quad (S2)$$

where  $\eta = (V_{xx} - V_{yy}) / (V_{zz})$  is an asymmetry parameter reflecting the asymmetry in the distribution of the electrons around the nucleus; each component is taken as  $|V_{zz}| \geq |V_{yy}| \geq |V_{xx}|$ . For the calculation of  $\Delta E_Q$  it is worth to consider that  $e = 1.602 \cdot 10^{-19} \text{C}$ , for  $^{57}\text{Fe}$   $Q = 150 - 160 \text{ mb}$  (where  $1 \text{ mb} = 10^{-31} \text{ m}^2$ ) and  $V_{zz}$  is calculated in atomic units (*a.u.*) via DFT (where  $1 \text{ a.u.} = 9.717365 \cdot 10^{21} \text{ V/m}^2$ ). The product  $eQV_{zz}$  has conventional units of  $[C][\text{m}^2][\text{V/m}^2] = [J]$  while  $1 \text{ J} = 6.242 \cdot 10^{18} \text{ eV}$  and  $1 \text{ mm/s} = 4.805 \cdot 10^{-8} \text{ eV}$ .



**Table S1.** Calculation of an electron density at the  $^{57}\text{Fe}$  nucleus in the complex  $(\text{Fe}^{2+})@L4$  using the different convergence criteria; B3LYP functional; NRAD = 300

| Electron density | Convergence |
|------------------|-------------|
| 11578.995020     | 1.00E-05    |
| 11578.995008     | 1.00E-06    |
| 11578.995009     | 1.00E-07    |

**Table S2.** Calculation of an electron density at the  $^{57}\text{Fe}$  nucleus in the complex  $(\text{Fe}^{2+})@L4$  using the different NRAD values; B3LYP functional; convergence = 1d-06

| Electron density | Convergence |
|------------------|-------------|
| 11578.995075     | 100         |
| 11578.995010     | 200         |
| 11578.995008     | 300         |
| 11578.995008     | 400         |
| 11578.995010     | 500         |

**Table S3.** Calculation of an electron density at the  $^{57}\text{Fe}$  nucleus in the complex  $(\text{Fe}^{2+})@L4$  using the experimental XRD and DFT-optimized geometries

| Method | Electron density |
|--------|------------------|
| XRD    | 11578.995010     |
| DFT    | 11578.995015     |

**Table S4.** The calculated QS values (mm/s) which were obtained using various DFT functionals

| Functional | Compound               | V <sub>zz</sub> (a.u.) | V <sub>yy</sub> (a.u.) | V <sub>xx</sub> (a.u.) | $\eta$ | QS <sub>calcd</sub> | QS <sub>exp</sub> |
|------------|------------------------|------------------------|------------------------|------------------------|--------|---------------------|-------------------|
| B3LYP      | (Fe <sup>2+</sup> )@L1 | 1.08                   | -0.82                  | -0.26                  | 0.525  | 1.761               | 3.55              |
|            | (Fe <sup>2+</sup> )@L2 | 0.06                   | -0.05                  | -0.01                  | 0.632  | 0.096               | 0.00              |
|            | (Fe <sup>2+</sup> )@L3 | 0.31                   | -0.27                  | -0.04                  | 0.762  | 0.531               | 0.56              |
|            | (Fe <sup>2+</sup> )@L4 | -0.55                  | 0.31                   | 0.24                   | 0.115  | -0.867              | 0.71              |
|            | (Fe <sup>2+</sup> )@L5 | -0.16                  | 0.13                   | 0.03                   | 0.592  | -0.265              | 0.70              |
|            | (Fe <sup>2+</sup> )@L6 | -0.35                  | 0.31                   | 0.04                   | 0.766  | -0.604              | 0.65              |
| BP86       | (Fe <sup>2+</sup> )@L1 | -0.88                  | 0.82                   | 0.06                   | 0.854  | -1.541              | 3.55              |
|            | (Fe <sup>2+</sup> )@L2 | 0.28                   | -0.15                  | -0.13                  | 0.089  | 0.434               | 0.00              |
|            | (Fe <sup>2+</sup> )@L3 | 0.18                   | -0.16                  | -0.024                 | 0.740  | 0.313               | 0.56              |
|            | (Fe <sup>2+</sup> )@L4 | -0.22                  | 0.14                   | 0.08                   | 0.292  | -0.342              | 0.71              |
|            | (Fe <sup>2+</sup> )@L5 | -0.10                  | 0.08                   | 0.02                   | 0.589  | -0.166              | 0.70              |
|            | (Fe <sup>2+</sup> )@L6 | 0.11                   | -0.10                  | -0.005                 | 0.898  | 0.189               | 0.65              |
| OLYP       | (Fe <sup>2+</sup> )@L1 | -0.81                  | 0.63                   | 0.18                   | 0.553  | -1.328              | 3.55              |
|            | (Fe <sup>2+</sup> )@L2 | 0.28                   | -0.15                  | -0.13                  | 0.082  | 0.439               | 0.00              |
|            | (Fe <sup>2+</sup> )@L3 | 0.18                   | -0.16                  | -0.03                  | 0.716  | 0.309               | 0.56              |
|            | (Fe <sup>2+</sup> )@L4 | -0.10                  | 0.08                   | 0.02                   | 0.617  | -0.162              | 0.71              |
|            | (Fe <sup>2+</sup> )@L5 | -0.85                  | 0.79                   | 0.06                   | 0.855  | -1.487              | 0.70              |
|            | (Fe <sup>2+</sup> )@L6 | 0.11                   | -0.10                  | -0.007                 | 0.865  | 0.189               | 0.65              |
| RPBE       | (Fe <sup>2+</sup> )@L1 | -0.85                  | 0.79                   | 0.06                   | 0.855  | -1.487              | 3.55              |
|            | (Fe <sup>2+</sup> )@L2 | 0.28                   | -0.15                  | -0.13                  | 0.086  | 0.446               | 0.00              |
|            | (Fe <sup>2+</sup> )@L3 | 0.18                   | -0.15                  | -0.025                 | 0.720  | 0.302               | 0.56              |
|            | (Fe <sup>2+</sup> )@L4 | -0.20                  | 0.13                   | 0.07                   | 0.298  | -0.322              | 0.71              |
|            | (Fe <sup>2+</sup> )@L5 | -0.10                  | 0.077476               | 0.02                   | 0.609  | -0.160              | 0.70              |
|            | (Fe <sup>2+</sup> )@L6 | 0.01                   | -0.092                 | -0.008                 | 0.833  | 0.174               | 0.65              |
| TPSS       | (Fe <sup>2+</sup> )@L1 | 0.89                   | -0.73                  | -0.15                  | 0.654  | 1.487               | 3.55              |
|            | (Fe <sup>2+</sup> )@L2 | 0.22                   | -0.12                  | -0.10                  | 0.125  | 0.343               | 0.00              |
|            | (Fe <sup>2+</sup> )@L3 | 0.19                   | -0.17                  | -0.023                 | 0.764  | 0.333               | 0.56              |
|            | (Fe <sup>2+</sup> )@L4 | -0.26                  | 0.15                   | 0.10                   | 0.202  | -0.407              | 0.71              |
|            | (Fe <sup>2+</sup> )@L5 | -0.11                  | 0.083918               | 0.02                   | 0.590  | -0.175              | 0.70              |
|            | (Fe <sup>2+</sup> )@L6 | 0.14                   | -0.13                  | -0.007                 | 0.900  | 0.245               | 0.65              |

**Table S5.** The calculated QS values (mm/s) for the complex (Fe<sup>2+</sup>)@L4 which were obtained using various basis sets

| Basis set | V <sub>zz</sub> (a.u.) | V <sub>yy</sub> (a.u.) | V <sub>xx</sub> (a.u.) | η    | QS <sub>calcd</sub> | QS <sub>exp</sub> |
|-----------|------------------------|------------------------|------------------------|------|---------------------|-------------------|
| STO-6G    | -0.29                  | 0.17                   | 0.12                   | 0.19 | -0.454              | 0.71              |
| 631-G     | -0.38                  | 0.22                   | 0.16                   | 0.15 | -0.595              |                   |
| CCT       | -0.44                  | 0.25                   | 0.19                   | 0.13 | -0.685              |                   |
| TZV       | -0.55                  | 0.31                   | 0.24                   | 0.11 | -0.867              |                   |
| SPKrTZV   | -0.45                  | 0.26                   | 0.20                   | 0.13 | -0.713              |                   |
